54 report events, 17 species in 17 countries (22). The most frequently reported infected mammals in  
55 zoos are felines, followed by primates (23). However, detection of SARS-CoV-2 infections in zoo  
56 animals has relied on the observation of symptoms (cough, nasal discharge), behaviour changes  
57 (reduced appetite, lethargy), or death of these captive animals (24,25). SARS-CoV-2 infections may  
58 therefore remain undetected if animals do not show obvious symptoms.

59 Since infected animals have been found in zoos worldwide, and the long-term high incidence of the  
60 virus in humans, we deemed it prudent to monitor the presence of SARS-CoV-2 in zoo animals.  
61 Furthermore, the high diversity of animals in zoos, both regarding taxonomy and geographical origin,  
62 makes zoos an ideal place to (i) contribute to unravelling the potential host range of SARS-CoV-2 and  
63 (ii) evaluate the risk for the conservation of wild animal populations in captivity and *in situ*. For this  
64 study, we investigated the potential circulation of SARS-CoV-2 in zoo mammal species by sampling  
65 and screening faecal samples from all the mammals in two zoos in Belgium in four sessions between  
66 September 2020 and July 2021 via real-time polymerase chain reactions (PCR). Following the  
67 symptomatic SARS-CoV-2 infection in hippos in the Antwerp zoo in December 2021 (26), we  
68 additionally surveyed selected mammals deemed in potential indirect contact with the hippos or with  
69 expected relatively high SARS-CoV-2 susceptibility.

70

71

## 72 MATERIAL AND METHODS

73

### 74 Samples collection

75 We conducted this study at the Antwerp Zoo and Planckendael Zoo, in respectively Antwerp and  
76 Mechelen, Belgium. We collected the samples during four periods (early September 2020, mid-  
77 October 2020, mid-December 2020 and July 2021), with sampling following enclosure cleaning  
78 planning. During the first sampling period, both zoos were still open to the public; during the second  
79 sampling series both zoos were closed to the public and remained closed until after the third sampling  
80 due to government regulations. The zoos reopened in February 2021, and the fourth sampling  
81 session was conducted in July 2021. During the first three sampling sessions the original Wuhan-Hu1  
82 variant was dominant in the human population in Belgium, during the fourth the delta variant,  
83 considered as more contagious than the previous alpha, beta, and gamma variants (27), was  
84 dominant in Belgium.

85 Faecal samples were collected by zookeepers in a 16.5 mL tube filled with RNAlater and then stored  
86 at -20 °C at the zoo for a few days before transport to the lab where the samples were stored at -80  
87 °C. RNAlater is a suitable conservation medium widely used for microbiological studies (28,29). The  
88 date and freshness of each sample were documented (maximum two hours old, or not more than  
89 twelve hours old) after which the samples were stored. A maximum of five samples per species, per  
90 zoo, were collected at each sampling session. A total of 1417 faeces samples were collected from  
91 103 different mammal species (Antwerp N= 48 and Planckendael N= 67) (**Table**). In Antwerp Zoo, the  
92 largest sampled taxonomic group was the Primates, followed by the order of the Cetartiodactyla. In  
93 Planckendael, Cetartiodactyla was sampled most often, followed by the order of the Carnivora.  
94 Additionally, 50 blood samples from 26 mammal species were available from routine collection by the  
95 zoo veterinary service, both before (14 samples/12 species) and after (36 samples/ 26 species) 2020,  
96 for animals that either moved between zoos or for those requiring a veterinary follow-up (pregnancy,  
97 injury, illness).

98 After our systematic surveillance was completed, two female hippopotamuses in Antwerp Zoo showed  
99 evidence of nasal discharge in late November 2021 for a few days (26,30). SARS-CoV-2 was  
100 detected by immunocytochemistry in nasal swab samples, and by PCR in nasal swab samples,  
101 faeces, and pool water (26). Serological tests also detected antibodies against SARS-CoV-2.

102 Following these hippo infections, we conducted in December 2021 a targeted surveillance for SARS-  
103 CoV-2, collecting samples from mammals that could have been in indirect contact with the hippo  
104 individuals (i.e. if they were managed by the same caretakers) or that were of special interest due to  
105 their known increased susceptibility and conservation status, namely primates and large felines. We

106 screened these samples with the CDC 2019-Novel Coronavirus (2019-nCoV) Real-Time RT-PCR  
107 Diagnostic Panel, specifically targeting SARS-CoV-2 genes, which was also used for the diagnosis of  
108 SARS-CoV-2 in the infected hippopotamuses' faecal samples (31). Details on the 106 samples  
109 collected and tested are also available in **Table**.

110

#### 111 **Sample preparation, extraction and PCR testing**

112 After thawing, the samples were processed under a Biosafety cabinet class II. Around 1 cm<sup>3</sup> of the  
113 faeces was cut off, rinsed with 200 µL of Phosphate-buffered saline (PBS), and mixed in a 1.5 mL  
114 Eppendorf tube filled with 800 µL of PBS. The tubes were briefly vortexed, centrifuged (1500g for 15  
115 min), and for each collection date/enclosure/species, samples were pooled to extract faecal RNA  
116 using the QIAGEN QIAamp viral RNA kit (Qiagen, Valencia, CA) following the manufacturer  
117 recommendations. Overall, 420 pools were extracted. Reverse transcription was performed on 8 µL of  
118 RNA extract using the Maxima Reverse Transcriptase and Random Hexamer Primers (Thermo Fisher  
119 Scientific, Waltham, MA) on a Biometra T3000 thermocycler (Biometra, Westburg, The Netherlands).  
120 A Pan-coronavirus system suitable for the detection of alpha-, beta-, gamma- and delta-CoVs real-  
121 time PCR adapted version of the Muradrasoli et al. (2009) protocol (32,33) was used on a StepOne™  
122 Real-Time PCR System (Applied Biosystems, Carlsbad, CA) to screen the samples for all potential  
123 coronaviruses that may occur in the zoo animals.

124

#### 125 **Validation of the PCR system for the detection of SARS-CoV-2**

126 We conducted assays to validate the use of the Pan-CoV system for the detection of SARS-CoV-2 in  
127 our samples. We compared the limit of detection of the Pan-CoV system targeting the polymerase  
128 gene to the CDC 2019-Novel Coronavirus (2019-nCoV) Real-Time RT-PCR Diagnostic Panel  
129 specifically targeting SARS-CoV-2 N1 gene (31). The limit of detection was determined to be the  
130 lowest dilution that still resulted with a Ct value. RNA from a SARS-CoV-2 positive clinical sample was  
131 used to conduct this assay. The CDC Real-Time RT PCR was performed on a serial dilution of the  
132 positive sample RNA ranging from 10<sup>-1</sup> to 10<sup>-8</sup>. The same 8-fold dilution series was reverse  
133 transcribed to cDNA (using the Maxima RT protocol described above), which was then run on the  
134 Pan-CoV Real-Time PCR.

135 In addition, a synthetic N1 and N2 gene positive control (2019-nCoV\_N\_Positive Control, Integrated  
136 DNA Technologies) with known copy number was used in the CDC panel at three concentrations:  
137 2000 copies/ µL, 200 copies/ µL and 20 copies/ µL. The Pan-CoV Real-Time PCR was used on the  
138 cDNA synthesised following the reverse-transcription protocol described above, from the SARS-CoV-2  
139 positive clinical sample RNA ranging from 10<sup>-1</sup> to 10<sup>-8</sup>. Each dilution was tested in triplicates.

140 For each system, the standard curve of the positive clinical sample was calculated by plotting PCR  
141 cycle threshold (Ct) to dilution number of the positive clinical sample, from which the logarithmic  
142 function ( $y = -a \ln(x) + b$ ) was calculated. If the R<sup>2</sup> value was less than 0.96 all serially diluted RNA  
143 and cDNA was remade and retested.

144 The copy number concentration of SARS-CoV-2 N gene RNA in the SARS-CoV-2 clinical sample was  
145 inferred via the standard curve of the 2019-nCoV\_N\_Positive Control dilution series used in the CDC  
146 system.

147

#### 148 **Serological screening**

149 Serum samples were tested for presence of antibodies against SARS-CoV-2 with the L00847  
150 surrogate virus neutralization test (sVNT) (GenScript cPass™, USA) as described in Mariën et al.  
151 (34). The percentage inhibition was calculated as:  $((1 - \text{OD value of sample}) / \text{OD value of Negative}$   
152  $\text{control}) \times 100\%$ . If inhibition values were greater than 20%, serum samples were considered SARS-  
153 CoV-2 positive. Two negative serum samples, two positive serum samples and two positive serum  
154 samples from SARS-CoV-2-infected humans were used as controls. Details on samples tested are  
155 available in Supplementary material **Table S1**.

156

157

## 158 RESULTS AND DISCUSSION

159

160 None of the 1523 faecal samples across the five collection periods tested positive with the Pan-  
161 coronavirus screening system. All serum samples were seronegative for neutralizing antibodies,  
162 suggesting that the tested mammals had not experienced SARS-CoV-2 infection at the time of sample  
163 collection (Supplementary material **Figure S1**). As such, apart from the infection in two hippos in  
164 December 2021 that was discovered because of clinical symptoms and not through our active  
165 surveillance study, there was no evidence of SARS-CoV-2 or other coronavirus infection among the  
166 mammals residing in the Antwerp and Planckendael Zoos during the time span of the study.

167

168 We compared the Pan-CoV PCR system that we used to test faecal samples collected during the first  
169 four sampling sessions between September 2020-July 2021 with a golden standard test for SARS-  
170 CoV-2 detection (CDC N1/N2) to ensure the sensitivity of the detection system was not an issue. We  
171 inferred the copy number per  $\mu\text{L}$  of a positive control SARS-CoV-2 RNA from a patient through  
172 comparing with known copy numbers of the N1 synthetic control of the CDC SARS-CoV-2 system. In  
173 both systems the template was detectable up to a  $10^{-5}$  dilution, corresponding to 2.42 N1-gene-  
174 copies/ $\mu\text{L}$  with Ct values of  $34.76 \pm 0.12$  (CDC) and  $38.84 \pm 2.48$  (Pan-CoV) (Supplementary material  
175 **Figure S2**). Hence, the detection limit and sensitivity of the CDC and the Pan-CoV system were very  
176 comparable, making it unlikely the choice of a Pan-coronavirus RT-PCR system instead of a SARS-  
177 CoV-2-specific detection system caused false-negative results. The added advantage of the Pan-CoV  
178 system is that with one PCR test, we could also determine the possible presence of other  
179 coronaviruses. While perhaps not the entire range of coronaviruses can be detected with the same  
180 sensitivity with this Pan-CoV system, it has been validated to detect SARS-CoV-2 polymerase gene.

181

182 Virus survival or successful detection of viral RNA depends on the type of virus, the medium in which  
183 it is present and environmental conditions (temperature, pH, moisture content, organic matter, light,  
184 etc.) (35). Although the SARS-CoV-2 virus is stable on most indoor surfaces (36–38), other factors in  
185 outdoor environments may reduce its survival (39). Studies on the effect of temperature on SARS-  
186 CoV-2 survival showed that it may survive from 5 to 10 days at  $20^{\circ}\text{C}$  and from 1 to 4 days at  $30^{\circ}\text{C}$   
187 depending on the surface type (40). Even if no studies on SARS-CoV-2 stability in faeces in outdoor  
188 environments have been conducted, a comprehensive study on the survival of several other  
189 coronaviruses in faeces concluded that SARS-CoV-2 could survive from 1 hour to 4 days in human  
190 faeces, depending on the type and pH of the stool samples (35). In our study, the delay between  
191 excretion and collection, and other environmental factors might have influenced the quality of the  
192 samples. However, we tried to limit these issues by collecting the samples as fresh as possible (less  
193 than 12h after excretion). In addition, we made sure to collect the central part of the faeces and to use  
194 the central part of the sample in the laboratory to limit the effect of environmental factors on the  
195 degradation of viral RNA. Finally, the mean temperature ranged from 0 to  $22^{\circ}\text{C}$  during the whole  
196 sampling campaign. We therefore assume that the impact of temperature on the preservation of  
197 faeces on the enclosures ground will be minimal.

198

199 The non-detection of SARS-CoV-2 RNA in this study might be related to the study sampling design.  
200 Faecal samples are suitable material for the detection of SARS-CoV-2 RNA, even if there is no  
201 consensus about which sample type (i.e., nasopharyngeal swabs, oropharyngeal swabs, faeces, or  
202 rectal swabs) is best suited to detect SARS-CoV-2 RNA, especially in non-human animals (41–43).

203 Moreover, we cannot exclude we missed a potential SARS-CoV-2 infection in zoo mammals in our  
204 study because of the duration of SARS-CoV-2 RNA in faeces after the acute infection. Zhang et al.  
205 (2021) conducted a systematic review and meta-analysis on 14 studies on the faecal shedding of  
206 SARS-CoV-2 RNA in human patients ( $N = 620$ ) with COVID-19 infection (42). On average, viral RNA  
207 could be detected up to 21.8 days after infection, while nasopharyngeal swabs could only detect RNA  
208 14.7 days after infection. The sampling sessions had on average 6 weeks apart, with over 6 months  
209 between the two subsequent sessions. We therefore cannot exclude that SARS-CoV-2 infections

210 occurred between the sampled sessions. However, due to logistical reasons, more frequent sampling  
211 was not feasible. Nevertheless, longitudinal faecal screening of infected tigers and lions in the USA  
212 and hippos in Belgium showed that SARS-CoV-2 RNA could be detected up to 35 days after symptom  
213 onset (25,26). Viral RNA shedding in these animals' faeces may be more apparent than what is  
214 observed in humans, where only about half of the patients have detectable SARS-CoV-2 RNA in  
215 faeces at any point during infection, and if they do, viral RNA remains detectable for 3-4 weeks.

216  
217 Also, a systematic blood sampling of all the animals to conduct serology testing and look for past  
218 infection rather than ongoing infection could have helped unravel this bias related to the time  
219 windows. In humans, IgG antibodies can be detected at least 3 months after SARS-CoV-2 infection  
220 (44–47). However, little is known about the persistence of antibodies in wild mammals after infection  
221 (48). In our case, systematic blood sampling would have involved heavy logistic organisation and  
222 animal stress. We therefore relied on 50 collected serum samples from 26 species that were collected  
223 for other purposes, representing about 10% of the mammals from the zoo. Their seronegativity  
224 suggests that at least up until 2021 there has been no widespread multi-species SARS-CoV-2  
225 epidemic in the zoos.

226  
227 Previously reported cases of SARS-CoV-2 infections in zoo animals have been traced back to  
228 asymptomatic COVID-19 infected zookeepers that were in contact with these animals (23–25). The  
229 close contact of zookeepers when preparing food, veterinary consultation of animals, or enclosure  
230 cleaning represents an important risk of transmission. Since the summer of 2020 and throughout the  
231 time period of our study, face masks have been worn throughout in the Antwerp and Planckendael  
232 zoos, both by zookeepers and visitors, in addition to the already extensive hygiene measures when  
233 preparing food and entering the facilities. It is likely that the hygiene measures implemented in both  
234 Antwerp and Planckendael zoos at the beginning of the pandemic have helped to avoid the  
235 transmission of SARS-CoV-2 from humans to animals during most of the pandemic.

236 The origin of the infection of the two hippos at Antwerp Zoo in November 2021 is not known. The  
237 caretakers had no known infection, did not have any COVID-19 symptoms prior to the hippo's  
238 infection, and were wearing surgical masks during their work (26). While several meters distance is  
239 kept from the visitors, as the hippos are housed indoors aerosol transmission from an infected visitor  
240 without perfect masking could have taken place. The genome sequence of the Delta variant with  
241 which the hippos were infected was indeed closely related to strains commonly circulating in Belgium  
242 at the time (26).

243  
244 The infection of precisely two hippopotamuses in the Antwerp Zoo was unexpected in the sense that  
245 other mammal species have been predicted to be much more susceptible to SARS-CoV-2 based on  
246 *in silico* models of the molecular interaction between the virus Spike protein and the host receptor  
247 ACE2.

248 The predictions of SARS-CoV-2 binding propensity to the hippopotamus viral receptor ACE2  
249 classified the hippopotamus only at medium risk to be infected with SARS-CoV-2 while other taxa  
250 such as primates were classified as high risk (19,20). However, no primates have been reported  
251 infected in Antwerp and Planckendael zoos. The fact that the hippos were housed in an indoor  
252 complex where also visitors enter, could have contributed to an elevated infection risk of these  
253 species. Other species including bongo, tapir and nutria that were kept in the vicinity of the infected  
254 hippos were negative when sampled right after the reported hippopotamus infections. Visitors did not  
255 have access to their indoor enclosure. The hippopotamus infections emphasize that the structural  
256 analysis of the SARS-CoV-2 cellular receptor alone is insufficient to estimate the relative spillover risk  
257 of SARS-CoV-2 to other animal species (19–21). Monitoring of zoonotic infections remains the main  
258 key in controlling and limiting the spread of zoonotic pathogens.

259

260

261 **AUTHOR CONTRIBUTIONS**

262 LJ, EV, FV, SG, JM and HL developed the research methodology. TC and LJ conducted the lab work.  
263 LJ drafted the article. LJ, EV, FV, SG, TC, JM, and HL reviewed the article. All authors read and  
264 approved the final manuscript and its submission for publication.

265  
266

## 267 **ACKNOWLEDGEMENT**

268 We thank the zookeepers from the Antwerp and Planckendael Zoos for collecting the samples.  
269 The project was funded by BiodivERsa BioDiv-AFREID and BioRodDis projects and the Corona  
270 extensions of these projects, funded by the European Commission and the Research Foundation –  
271 Flanders (FWO). SG is a FED-tWIN scholar funded by the Belgian federal government. LJ is and JM  
272 was a postdoctoral fellow of the Research Foundation – Flanders (FWO) [Grant # 1271922N and  
273 #12ZJ721N].

274  
275

## 276 **REFERENCES**

277

- 278 1. The Lancet Respiratory Medicine. COVID-19 transmission—up in the air. *Lancet Respir Med.*  
279 2020 Dec 1;8(12):1159.
- 280 2. Boklund A, Gortázar C, Pasquali P, Roberts H, Nielsen SS, Stahl K, et al. Monitoring of SARS-  
281 CoV-2 infection in mustelids. *EFSA J.* 2021;19(3).
- 282 3. Oreshkova N, Molenaar RJ, Vreman S, Harders F, Munnink BBO, Honing RWH der, et al.  
283 SARS-CoV-2 infection in farmed minks, the Netherlands, April and May 2020.  
284 *Eurosurveillance.* 2020 Jun 11;25(23).
- 285 4. Domańska-Blicharz K, Orłowska A, Smreczak M, Niemczuk K, Iwan E, Bomba A, et al. Mink  
286 SARS-CoV-2 infection in Poland - Short communication. *J Vet Res.* 2021 Mar 9;65(1):1–5.
- 287 5. Chandler JC, Bevins SN, Ellis JW, Linder TJ, Tell RM, Jenkins-Moore M, et al. SARS-CoV-2  
288 exposure in wild white-tailed deer (*Odocoileus virginianus*). *Proc Natl Acad Sci.* 2021 Nov  
289 23;118(47):e2114828118.
- 290 6. Aguiló-Gisbert J, Padilla-Blanco M, Lizana V, Maiques E, Muñoz-Baquero M, Chillida-Martínez  
291 E, et al. First description of sars-cov-2 infection in two feral American mink (*Neovison vison*)  
292 caught in the wild. *Animals.* 2021 May 16;11(5):1422.
- 293 7. Sit THC, Brackman CJ, Ip SM, Tam KWS, Law PYT, To EMW, et al. Infection of dogs with  
294 SARS-CoV-2. *Nature.* 2020 Oct 29;586(7831):776–8.
- 295 8. Sailleau C, Dumarest M, Vanhomwegen J, Delaplace M, Caro V, Kwasiborski A, et al. First  
296 detection and genome sequencing of SARS-CoV-2 in an infected cat in France. *Transbound*  
297 *Emerg Dis.* 2020 Nov 1;67(6):2324–8.
- 298 9. Bosco-Lauth AM, Hartwig AE, Porter SM, Gordy PW, Nehring M, Byas AD, et al. Experimental  
299 infection of domestic dogs and cats with SARS-CoV-2: Pathogenesis, transmission, and  
300 response to reexposure in cats. *Proc Natl Acad Sci.* 2020 Oct 20;117(42):26382–8.
- 301 10. Böszörményi KP, Stammes MA, Fagrouch ZC, Kiemenyi-Kayere G, Niphuis H, Mortier D, et al.  
302 Comparison of SARS-CoV-2 infection in two non-human primate species: rhesus and  
303 cynomolgus macaques. *bioRxiv.* 2020 Nov 5;2020.11.05.369413.
- 304 11. Halfmann PJ, Hatta M, Chiba S, Maemura T, Fan S, Takeda M, et al. Transmission of SARS-  
305 CoV-2 in Domestic Cats. *N Engl J Med.* 2020 Aug 6;383(6):592–4.
- 306 12. Shi J, Wen Z, Zhong G, Yang H, Wang C, Huang B, et al. Susceptibility of ferrets, cats, dogs,  
307 and other domesticated animals to SARS-coronavirus 2. *Science.* 2020 May  
308 29;368(6494):1016–20.
- 309 13. Ulrich L, Wernike K, Hoffmann D, Mettenleiter TC, Beer M. Experimental Infection of Cattle  
310 with SARS-CoV-2 - Volume 26, Number 12—December 2020 - *Emerging Infectious Diseases*  
311 *journal - CDC.* *Emerg Infect Dis.* 2020 Dec 1;26(12):2979–81.
- 312 14. Kim Y Il, Kim SG, Kim SM, Kim EH, Park SJ, Yu KM, et al. Infection and Rapid Transmission  
313 of SARS-CoV-2 in Ferrets. *Cell Host Microbe.* 2020 May 13;27(5):704-709.e2.
- 314 15. Richard M, Kok A, de Meulder D, Bestebroer TM, Lamers MM, Okba NMA, et al. SARS-CoV-2  
315 is transmitted via contact and via the air between ferrets. *Nat Commun.* 2020;11(1).
- 316 16. Schlottau K, Rissmann M, Graaf A, Schön J, Sehl J, Wylezich C, et al. SARS-CoV-2 in fruit  
317 bats, ferrets, pigs, and chickens: an experimental transmission study. *The Lancet Microbe.*  
318 2020 Sep 1;1(5):e218–25.
- 319 17. Sia SF, Yan LM, Chin AWH, Fung K, Choy KT, Wong AYL, et al. Pathogenesis and

- 320 transmission of SARS-CoV-2 in golden hamsters. *Nat* 2020 5837818. 2020 May  
321 14;583(7818):834–8.
- 322 18. Griffin BD, Chan M, Taylor N, Mendoza EJ, Leung A, Warner BM, et al. SARS-CoV-2 infection  
323 and transmission in the North American deer mouse. *Nat Commun* 2021 121. 2021 Jun  
324 14;12(1):1–10.
- 325 19. Liu Y, Hu G, Wang Y, Ren W, Zhao X, Ji F, et al. Functional and genetic analysis of viral  
326 receptor ACE2 orthologs reveals a broad potential host range of SARS-CoV-2. *Proc Natl Acad  
327 Sci*. 2021 Mar 23;118(12).
- 328 20. Damas J, Hughes GM, Keough KC, Painter CA, Persky NS, Corbo M, et al. Broad host range  
329 of SARS-CoV-2 predicted by comparative and structural analysis of ACE2 in vertebrates. *Proc  
330 Natl Acad Sci U S A*. 2020 Sep 8;117(36):22311.
- 331 21. Mollentze N, Keen D, Munkhbayar U, Biek R, Streicker DG. Variation in the ACE2 receptor  
332 has limited utility for SARS-CoV-2 host prediction. *Elife*. 2022 Nov 23;11.
- 333 22. Nerpel A, Yang L, Sorger J, Käsbohrer A, Walzer C, Desvars-Larrive A. SARS-ANI: a global  
334 open access dataset of reported SARS-CoV-2 events in animals. *Sci Data*. 2022;9(1):1–13.
- 335 23. Goraichuk I V., Arefiev V, Stegnyy BT, Gerilovych AP. Zoonotic and Reverse Zoonotic  
336 Transmissibility of SARS-CoV-2. *Virus Res*. 2021 Sep 1;302:198473.
- 337 24. McAloose D, Laverack M, Wang L, Killian ML, Caserta LC, Yuan F, et al. From People to  
338 Panthera: Natural SARS-CoV-2 Infection in Tigers and Lions at the Bronx Zoo. *MBio*. 2020  
339 Sep 1;11(5):1–13.
- 340 25. Bartlett SL, Diel DG, Wang L, Zec S, Laverack M, Martins M, et al. Sars-COV-2 infection and  
341 longitudinal fecal screening in malayan tigers (*panthera tigris jacksoni*), amur tigers (*Panthera  
342 Tigris Altaica*), and African lions (*panthera Leo Krugeri*) at the bronx Zoo, New York, USA. *J  
343 Zoo Wildl Med*. 2021 Jan 12;51(4):733–44.
- 344 26. Vercammen F, Cay B, Gryseels, S, Balmelle, N, Joffrin, L, Van Hoorde , K, Verhaegen, B,  
345 Mathijs, E, Van Vredendaal , R, Dharmadhikari , T, Chiers, K, Van Olmen , TJS, Agliani , G,  
346 Van den Brand J, Leirs H. SARS-CoV-2 Infection in Captive Hippos (*Hippopotamus  
347 amphibius*), Belgium. *Animals*. 2023;13(2):316.
- 348 27. Sciensano. Belgium COVID-19 Dashboard - Variants [Internet]. 2021. Available from:  
349 [https://datastudio.google.com/embed/reporting/c14a5cfc-cab7-4812-848c-  
350 0369173148ab/page/urrUC](https://datastudio.google.com/embed/reporting/c14a5cfc-cab7-4812-848c-0369173148ab/page/urrUC)
- 351 28. Wille M, Yin H, Lundkvist Å, Xu J, Muradrasoli S, Järhult JD. RNAlater® is a viable storage  
352 option for avian influenza sampling in logistically challenging conditions. *J Virol Methods*. 2018  
353 Feb 1;252:32–6.
- 354 29. Young RR, Jenkins K, Araujo-Perez F, Seed PC, Kelly MS. Long-term stability of microbiome  
355 diversity and composition in fecal samples stored in eNAT medium. *Microbiologyopen*. 2020  
356 Jul 1;9(7).
- 357 30. World Organisation for Animal Health- Belgium. Official report- Infection of Hippopotamus with  
358 SARS-COV-2 in Belgium zoo [Internet]. Brussels; 2022 [cited 2023 Jan 11]. Available from:  
359 [www.health.belgium.be](http://www.health.belgium.be)
- 360 31. Centers for Disease Control and Prevention. CDC’s Diagnostic Test for COVID-19 Only and  
361 Supplies. Laboratories. CDC; 2020. p. <https://www.cdc.gov/coronavirus/2019-ncov/lab/viru>.
- 362 32. Muradrasoli S, Mohamed N, Hornyák Á, Fohlman J, Olsen B, Belák S, et al. Broadly targeted  
363 multiprobe qPCR for detection of coronaviruses: coronavirus is common among mallard ducks  
364 (*Anas platyrhynchos*). *J Virol Methods*. 2009;159(2):277–87.
- 365 33. Joffrin L, Goodman SM, Wilkinson DA, Ramasindrazana B, Lagadec E, Gomard Y, et al. Bat  
366 coronavirus phylogeography in the Western Indian Ocean. *Sci Rep*. 2020 Dec 23;10(1):6873.
- 367 34. Mariën J, Michiels J, Heyndrickx L, Nkuba-Ndaye A, Ceulemans A, Bartholomeeusen K, et al.  
368 Evaluation of a surrogate virus neutralization test for high-throughput serosurveillance of  
369 SARS-CoV-2. *J Virol Methods*. 2021 Nov 1;297:114228.
- 370 35. Aboubakr HA, Sharafeldin TA, Goyal SM. Stability of SARS-CoV-2 and other coronaviruses in  
371 the environment and on common touch surfaces and the influence of climatic conditions: A  
372 review. *Transbound Emerg Dis*. 2021 Mar 14;68(2):296–312.
- 373 36. Guo Z-D, Wang Z-Y, Zhang S-F, Li X, Li L, Li C, et al. Aerosol and Surface Distribution of  
374 Severe Acute Respiratory Syndrome Coronavirus 2 in Hospital Wards, Wuhan, China, 2020.  
375 *Emerg Infect Dis*. 2020 Jul 1;26(7):1586.
- 376 37. Marquès M, Domingo JL. Contamination of inert surfaces by SARS-CoV-2: Persistence,  
377 stability and infectivity. A review. *Environ Res*. 2021 Feb 1;193:110559.
- 378 38. Van Doremalen N, Bushmaker T, Morris DH, Holbrook MG, Gamble A, Williamson BN, et al.  
379 Aerosol and Surface Stability of SARS-CoV-2 as Compared with SARS-CoV-1. *N Engl J Med*.

- 380 2020 Apr 16;382(16):1564–7.  
381 39. Ratnesar-Shumate S, Williams G, Green B, Krause M, Holland B, Wood S, et al. Simulated  
382 Sunlight Rapidly Inactivates SARS-CoV-2 on Surfaces. *J Infect Dis*. 2020 Jun 29;222(2):214–  
383 22.  
384 40. Riddell S, Goldie S, Hill A, Eagles D, Drew TW. The effect of temperature on persistence of  
385 SARS-CoV-2 on common surfaces. *Virology* 2020 171. 2020 Oct 7;17(1):1–7.  
386 41. Yongchen Z, Shen H, Wang X, Shi X, Li Y, Yan J, et al. Different longitudinal patterns of  
387 nucleic acid and serology testing results based on disease severity of COVID-19 patients. Vol.  
388 9, *Emerging Microbes and Infections*. Taylor & Francis; 2020. p. 833–6.  
389 42. Zhang Y, Cen M, Hu M, Du L, Hu W, Kim JJ, et al. Prevalence and Persistent Shedding of  
390 Fecal SARS-CoV-2 RNA in Patients With COVID-19 Infection: A Systematic Review and Meta-  
391 analysis. *Clin Transl Gastroenterol*. 2021 Apr 9;12(4):e00343.  
392 43. Wang W, Xu Y, Gao R, Lu R, Han K, Wu G, et al. Detection of SARS-CoV-2 in Different Types  
393 of Clinical Specimens. *JAMA*. 2020 May 12;323(18):1843–4.  
394 44. Fröberg J, Gillard J, Philipsen R, Lanke K, Rust J, van Tuijl D, et al. SARS-CoV-2 mucosal  
395 antibody development and persistence and their relation to viral load and COVID-19  
396 symptoms. *Nat Commun* 2021 121. 2021 Sep 23;12(1):1–11.  
397 45. Seow J, Graham C, Merrick B, Acors S, Pickering S, Steel KJA, et al. Longitudinal observation  
398 and decline of neutralizing antibody responses in the three months following SARS-CoV-2  
399 infection in humans. *Nat Microbiol* 2020 512. 2020 Oct 26;5(12):1598–607.  
400 46. Isho B, Abe KT, Zuo M, Jamal AJ, Rathod B, Wang JH, et al. Persistence of serum and saliva  
401 antibody responses to SARS-CoV-2 spike antigens in COVID-19 patients. *Sci Immunol*. 2020  
402 Oct 16;5(52).  
403 47. Iyer AS, Jones FK, Nodoushani A, Kelly M, Becker M, Slater D, et al. Persistence and decay of  
404 human antibody responses to the receptor binding domain of SARS-CoV-2 spike protein in  
405 COVID-19 patients. *Sci Immunol*. 2020 Oct 16;5(52).  
406 48. Palermo PM, Orbegozo J, Watts DM, Morrill JC. SARS-CoV-2 Neutralizing Antibodies in  
407 White-Tailed Deer from Texas. *Vector-Borne Zoonotic Dis*. 2022;22(1):62–4.  
408



109  
110

**Table.** Number of faecal samples collected per order, family and species in the two zoos for each sampling session.

| Order                  | Family    | Species                        | Antwerp   |           |           |           |           | Planckendael |           |           |           |           |           |           |
|------------------------|-----------|--------------------------------|-----------|-----------|-----------|-----------|-----------|--------------|-----------|-----------|-----------|-----------|-----------|-----------|
|                        |           |                                | Session 1 | Session 2 | Session 3 | Session 4 | Session 5 | TOTAL        | Session 1 | Session 2 | Session 3 | Session 4 | Session 5 | TOTAL     |
| <b>Cetartiodactyla</b> | Bovidae   | <i>Addax nasomaculatus</i>     |           |           |           |           |           |              | 5         | 5         | 5         | 4         |           | <b>19</b> |
|                        |           | <i>Bison bison</i>             |           |           |           |           |           |              | 5         | 5         | 5         | 5         |           | <b>20</b> |
|                        |           | <i>Bison bonasus</i>           |           |           |           |           |           |              | 3         | 3         | 3         | 3         |           | <b>12</b> |
|                        |           | <i>Bos taurus</i>              |           |           |           |           |           |              | 3         | 3         | 3         | 3         |           | <b>12</b> |
|                        |           | <i>Budorcas taxicolor</i>      | 2         | 2         | 2         | 2         |           | <b>8</b>     |           |           |           |           |           |           |
|                        |           | <i>Capra hircus</i>            |           |           |           |           |           |              | 5         | 5         | 5         | 5         |           | <b>20</b> |
|                        |           | <i>Cephalophus natalensis</i>  | 2         | 2         | 2         | 2         |           | <b>8</b>     |           |           |           |           |           |           |
|                        |           | <i>Gazella leptoceros</i>      |           |           |           |           |           |              | 3         | 3         | 3         | 1         |           | <b>10</b> |
|                        |           | <i>Madoqua kirkii</i>          | 4         | 4         | 4         |           |           | <b>12</b>    | 5         | 5         | 5         | 3         |           | <b>18</b> |
|                        |           | <i>Nanger dama</i>             |           |           |           |           |           |              | 3         | 3         | 3         | 5         |           | <b>14</b> |
|                        |           | <i>Oryx dammah</i>             |           |           |           |           |           |              | 1         | 1         | 1         | 1         |           | <b>4</b>  |
|                        |           | <i>Oryx leucoryx</i>           |           |           |           |           |           |              | 1         | 1         | 1         | 1         |           | <b>4</b>  |
|                        |           | <i>Ovis aries</i>              | 3         | 3         | 3         | 2         |           | <b>11</b>    | 5         | 5         | 5         | 3         |           | <b>18</b> |
|                        |           | <i>Ovis aries laticaudatus</i> |           |           |           |           |           |              | 2         | 2         | 2         |           |           | <b>6</b>  |
|                        |           | <i>Syncerus caffer</i>         | 5         | 5         | 5         | 5         |           | <b>20</b>    |           |           |           |           |           |           |
|                        |           | <i>Tragelaphus eurycerus</i>   | 3         | 3         | 3         | 3         | 4         | <b>16</b>    | 3         | 3         | 3         | 1         |           | <b>10</b> |
|                        | Camelidae | <i>Camelus bactrianus</i>      |           |           |           |           |           |              | 5         | 5         | 5         | 5         |           | <b>20</b> |
|                        |           | <i>Lama guanicoe</i>           |           |           |           |           |           |              | 5         | 5         | 5         | 3         |           | <b>18</b> |
|                        |           | <i>Vicugna pacos</i>           |           |           |           |           |           |              | 5         | 5         | 5         | 10        |           | <b>25</b> |
|                        |           | <i>Vicugna vicugna</i>         |           |           |           |           |           |              | 5         | 5         | 5         | 4         |           | <b>19</b> |
|                        | Cervidae  | <i>Cervus canadensis</i>       |           |           |           |           |           |              | 5         | 5         | 5         | 5         |           | <b>20</b> |
|                        |           | <i>Muntiacus reevesi</i>       |           |           |           |           |           |              | 5         | 5         | 5         | 5         |           | <b>20</b> |

| Order            | Family         | Species                        | Antwerp   |           |           |           |           | Planckendael |            |            |            |           |           |            |
|------------------|----------------|--------------------------------|-----------|-----------|-----------|-----------|-----------|--------------|------------|------------|------------|-----------|-----------|------------|
|                  |                |                                | Session 1 | Session 2 | Session 3 | Session 4 | Session 5 | TOTAL        | Session 1  | Session 2  | Session 3  | Session 4 | Session 5 | TOTAL      |
|                  | Equidae        | <i>Equus asinus</i>            |           |           |           |           |           |              | 2          | 2          | 2          | 2         |           | 8          |
|                  |                | <i>Equus caballus</i>          |           |           |           |           |           |              | 4          | 4          | 4          |           |           | 12         |
|                  |                | <i>Equus ferus przewalskii</i> |           |           |           |           |           |              |            |            |            | 4         |           | 4          |
|                  |                | <i>Equus grevyi</i>            |           |           |           |           |           |              | 5          | 5          | 5          | 5         |           | 20         |
|                  |                | <i>Equus zebra</i>             | 4         | 4         | 4         | 4         |           | 16           |            |            |            |           |           |            |
|                  | Giraffidae     | <i>Giraffa camelopardalis</i>  | 3         | 3         | 3         | 3         |           | 12           | 5          | 5          | 5          | 5         |           | 20         |
|                  |                | <i>Okapia johnstoni</i>        | 5         | 5         | 5         | 4         |           | 19           |            |            |            |           |           |            |
|                  | Hippopotamidae | <i>Hippopotamus amphibius</i>  | 2         | 2         | 2         | 2         |           | 8            |            |            |            |           |           |            |
|                  | Suidae         | <i>Sus cebifrons</i>           |           |           |           |           |           |              | 4          | 4          | 4          | 4         |           | 16         |
|                  |                | <i>Sus scrofa</i>              |           |           |           |           |           |              | 3          | 3          | 3          | 3         |           | 12         |
|                  | Tayassuidae    | <i>Catagonus wagneri</i>       |           |           |           |           |           |              | 5          | 5          | 5          | 5         |           | 20         |
|                  |                | <b>TOTAL</b>                   | <b>33</b> | <b>33</b> | <b>33</b> | <b>27</b> | <b>4</b>  | <b>130</b>   | <b>102</b> | <b>102</b> | <b>102</b> | <b>95</b> |           | <b>401</b> |
| <b>Carnivora</b> | Canidae        | <i>Crocuta crocuta</i>         |           |           |           |           |           |              | 2          | 2          | 2          | 3         |           | 9          |
|                  |                | <i>Speothos venaticus</i>      |           |           |           |           |           |              | 5          | 5          | 5          | 5         |           | 20         |
|                  | Felidae        | <i>Acinonyx jubatus</i>        |           |           |           |           |           |              | 2          | 2          | 2          | 2         | 2         | 10         |
|                  |                | <i>Panthera leo</i>            | 3         | 3         | 3         | 3         | 6         | 18           | 3          | 3          | 3          | 3         | 3         | 15         |
|                  |                | <i>Panthera onca</i>           |           |           |           |           |           |              | 1          | 1          | 1          | 1         | 2         | 6          |
|                  |                | <i>Panthera pardus</i>         |           |           |           |           |           |              | 1          | 1          | 1          |           |           | 3          |
|                  |                | <i>Panthera uncia</i>          |           |           |           |           |           |              | 2          | 2          | 2          | 2         |           | 8          |
|                  | Herpestidae    | <i>Cynictis penicillata</i>    | 5         | 5         | 5         | 5         |           | 20           |            |            |            |           |           |            |
|                  |                | <i>Mungos mungo</i>            |           |           |           |           |           |              | 5          | 5          | 5          | 5         |           | 20         |
|                  |                | <i>Suricata suricatta</i>      | 5         | 5         | 5         | 3         |           | 18           |            |            |            |           |           |            |

| Order                 | Family       | Species                        | Antwerp                       |           |           |           |           |           | Planckendael |           |           |           |           |            |
|-----------------------|--------------|--------------------------------|-------------------------------|-----------|-----------|-----------|-----------|-----------|--------------|-----------|-----------|-----------|-----------|------------|
|                       |              |                                | Session 1                     | Session 2 | Session 3 | Session 4 | Session 5 | TOTAL     | Session 1    | Session 2 | Session 3 | Session 4 | Session 5 | TOTAL      |
|                       | Mustelidae   | <i>Aonyx cinereus</i>          | 1                             | 1         | 1         |           |           | 3         | 4            | 4         | 4         |           |           | 12         |
|                       |              | <i>Meles meles</i>             |                               |           |           |           |           |           |              | 1         | 1         | 1         | 1         |            |
|                       | Otariidae    | <i>Phoca vitulina</i>          | 7                             | 7         | 7         | 2         |           | 23        |              |           |           |           |           |            |
|                       |              | <i>Zalophus californianus</i>  | 4                             | 4         | 4         | 2         |           | 14        |              |           |           |           |           |            |
|                       | Procyonidae  | <i>Nasua narica</i>            |                               |           |           |           |           |           | 1            | 1         | 1         | 2         |           | 5          |
|                       |              | <i>Nasua nasua</i>             |                               |           |           |           |           |           | 3            | 3         | 3         |           |           | 9          |
|                       |              | <i>Procyon lotor</i>           |                               |           |           |           |           |           | 2            | 2         | 2         |           |           | 6          |
|                       | Ursidae      | <i>Ailurus fulgens</i>         |                               |           |           |           |           |           | 2            | 2         | 2         | 2         |           | 8          |
|                       |              | <i>Tremarctos ornatus</i>      |                               |           |           |           |           |           | 2            | 2         | 2         | 2         |           | 8          |
|                       |              | <b>TOTAL</b>                   | <b>25</b>                     | <b>25</b> | <b>25</b> | <b>15</b> | <b>6</b>  | <b>96</b> | <b>36</b>    | <b>36</b> | <b>36</b> | <b>28</b> | <b>7</b>  | <b>143</b> |
| <b>Chiroptera</b>     | Pteropodidae | <i>Rousettus aegyptiacus</i>   |                               |           |           |           |           |           | 5            | 5         | 5         | 2         |           | 17         |
|                       |              | <b>TOTAL</b>                   |                               |           |           |           |           |           |              | 5         | 5         | 5         | 2         |            |
| <b>Dasyuromorphia</b> | Dasyuridae   | <i>Sarcophilus harrisii</i>    |                               |           |           |           |           |           | 3            | 3         | 3         | 3         |           | 12         |
|                       |              | <b>TOTAL</b>                   |                               |           |           |           |           |           |              | 3         | 3         | 3         | 3         |            |
| <b>Diprotodontia</b>  | Macropodidae | <i>Dendrolagus goodfellowi</i> | 1                             | 1         | 1         |           |           | 3         |              |           |           |           |           |            |
|                       |              | <i>Macropus giganteus</i>      | 4                             | 4         | 4         | 3         |           | 15        |              |           |           |           |           |            |
|                       |              | <i>Macropus parma</i>          | 3                             | 3         | 3         |           |           | 9         |              |           |           |           |           |            |
|                       |              | <i>Macropus rufus</i>          |                               |           |           |           |           |           | 1            | 1         |           | 2         |           | 4          |
|                       |              | <i>Thylogale brunii</i>        | 1                             | 1         | 1         |           |           | 3         | 1            | 1         | 1         | 1         |           | 4          |
|                       |              | <i>Wallabia bicolor</i>        |                               |           |           |           |           |           | 5            | 5         | 5         | 5         |           | 20         |
|                       |              | Phascolarctidae                | <i>Phascolarctos cinereus</i> | 1         | 1         | 1         | 2         |           | 5            | 2         | 2         | 2         | 1         |            |

| Order                 | Family          | Species                          | Antwerp   |           |           |           |           | Planckendael |           |           |           |           |           |           |
|-----------------------|-----------------|----------------------------------|-----------|-----------|-----------|-----------|-----------|--------------|-----------|-----------|-----------|-----------|-----------|-----------|
|                       |                 |                                  | Session 1 | Session 2 | Session 3 | Session 4 | Session 5 | TOTAL        | Session 1 | Session 2 | Session 3 | Session 4 | Session 5 | TOTAL     |
|                       | Potoroidae      | <i>Bettongia penicillata</i>     |           |           |           | 1         |           | 1            |           |           |           |           |           |           |
|                       |                 | <b>TOTAL</b>                     | <b>10</b> | <b>10</b> | <b>10</b> | <b>6</b>  |           | <b>36</b>    | <b>9</b>  | <b>9</b>  | <b>8</b>  | <b>9</b>  |           | <b>35</b> |
| <b>Lagomorpha</b>     | Leporidae       | <i>Oryctolagus cuniculus</i>     |           |           |           |           |           |              | 5         | 5         | 5         | 5         |           | 20        |
|                       |                 | <b>TOTAL</b>                     |           |           |           |           |           |              | 5         | 5         | 5         | 5         |           | 20        |
| <b>Macroscelidea</b>  | Macroscelididae | <i>Rhynchocyon petersi</i>       | 3         | 3         | 3         | 2         |           | 11           |           |           |           |           |           |           |
|                       |                 | <b>TOTAL</b>                     | <b>3</b>  | <b>3</b>  | <b>3</b>  | <b>2</b>  |           | <b>11</b>    |           |           |           |           |           |           |
| <b>Monotremata</b>    | Tachyglossidae  | <i>Tachyglossus aculeatus</i>    |           |           |           |           |           |              | 2         | 2         | 2         | 2         |           | 8         |
|                       |                 | <b>TOTAL</b>                     |           |           |           |           |           |              | 2         | 2         | 2         | 2         |           | 8         |
| <b>Perissodactyla</b> | Rhinocerotidae  | <i>Ceratotherium simum simum</i> | 2         | 2         | 2         | 2         |           | 8            |           |           |           |           |           |           |
|                       |                 | <i>Rhinoceros unicornis</i>      |           |           |           |           |           |              | 2         | 2         | 2         | 3         |           | 9         |
|                       | Tapiridae       | <i>Tapirus indicus</i>           | 3         | 3         | 3         | 2         | 4         | 15           |           |           |           |           |           |           |
|                       |                 | <b>TOTAL</b>                     | <b>5</b>  | <b>5</b>  | <b>5</b>  | <b>4</b>  | <b>4</b>  | <b>23</b>    | <b>2</b>  | <b>2</b>  | <b>2</b>  | <b>3</b>  |           | <b>9</b>  |
| <b>Pilosa</b>         | Myrmecophagidae | <i>Myrmecophaga tridactyla</i>   |           |           |           |           |           |              | 2         | 2         | 2         | 2         | 2         | 10        |
|                       |                 | <i>Tamandua tetradactyla</i>     | 1         | 1         | 1         |           |           | 3            |           |           |           |           |           |           |
|                       |                 | <b>TOTAL</b>                     | <b>1</b>  | <b>1</b>  | <b>1</b>  |           |           | <b>3</b>     | <b>2</b>  | <b>2</b>  | <b>2</b>  | <b>2</b>  | <b>2</b>  | <b>10</b> |

| Order           | Family          | Species                           | Antwerp   |           |           |           |           |           | Planckendael |           |           |           |           |           |  |
|-----------------|-----------------|-----------------------------------|-----------|-----------|-----------|-----------|-----------|-----------|--------------|-----------|-----------|-----------|-----------|-----------|--|
|                 |                 |                                   | Session 1 | Session 2 | Session 3 | Session 4 | Session 5 | TOTAL     | Session 1    | Session 2 | Session 3 | Session 4 | Session 5 | TOTAL     |  |
| <b>Primates</b> | Aotidae         | <i>Aotus trivirgatus</i>          | 1         | 1         | 1         |           |           | <b>3</b>  |              |           |           |           |           |           |  |
|                 | Atelidae        | <i>Ateles fusciceps</i>           | 5         | 5         | 5         | 5         | 6         | <b>26</b> |              |           |           |           |           |           |  |
|                 | Callitrichidae  | <i>Callimico goeldii</i>          | 5         | 5         | 5         | 5         | 2         | <b>22</b> |              |           |           |           |           |           |  |
|                 |                 | <i>Callithrix geoffroyi</i>       |           |           |           |           |           |           | 5            | 5         | 5         | 5         | 2         | <b>22</b> |  |
|                 |                 | <i>Cebuella pygmaea</i>           | 1         | 1         | 1         | 1         | 2         | <b>6</b>  |              |           |           |           |           |           |  |
|                 |                 | <i>Leontopithecus chrysomelas</i> | 3         | 3         | 3         |           |           | <b>9</b>  | 4            | 4         | 4         | 3         | 5         | <b>20</b> |  |
|                 |                 | <i>Saguinus imperator</i>         | 2         | 2         | 2         | 2         | 1         | <b>9</b>  |              |           |           |           |           |           |  |
|                 | Cebidae         | <i>Saimiri boliviensis</i>        |           |           |           |           |           |           | 3            | 3         | 3         |           |           | <b>9</b>  |  |
|                 | Cercopithecidae | <i>Cercopithecus hamlyni</i>      | 3         | 3         | 3         | 4         | 3         | <b>16</b> |              |           |           |           |           |           |  |
|                 |                 | <i>Colobus guereza</i>            | 4         | 4         | 4         | 4         | 2         | <b>18</b> |              |           |           |           |           |           |  |
|                 |                 | <i>Macaca nigra</i>               |           |           |           |           |           |           | 5            | 5         | 5         | 5         | 3         | <b>23</b> |  |
|                 |                 | <i>Macaca sylvanus</i>            |           |           |           |           |           |           | 5            | 5         | 5         | 5         | 3         | <b>23</b> |  |
|                 |                 | <i>Mandrillus sphinx</i>          | 5         | 5         | 5         | 5         | 4         | <b>24</b> |              |           |           |           |           |           |  |
|                 | Hominidae       | <i>Gorilla beringei</i>           | 1         | 1         | 1         | 1         | 1         | <b>5</b>  |              |           |           |           |           |           |  |
|                 |                 | <i>Gorilla gorilla</i>            | 5         | 5         | 5         | 5         | 5         | <b>25</b> |              |           |           |           |           |           |  |
|                 |                 | <i>Pan paniscus</i>               |           |           |           |           |           |           | 5            | 5         | 5         | 5         | 18        | <b>38</b> |  |
|                 |                 | <i>Pan troglodytes</i>            | 5         | 5         | 5         | 5         | 11        | <b>31</b> |              |           |           |           |           |           |  |
|                 | Hylobatidae     | <i>Nomascus leucogenys</i>        |           |           |           |           |           |           | 2            | 2         | 2         | 2         | 2         | <b>10</b> |  |
|                 | Lemuridae       | <i>Eulemur macaco</i>             |           |           |           |           |           |           | 2            | 2         | 2         | 3         | 2         | <b>11</b> |  |
|                 |                 | <i>Lemur catta</i>                | 2         | 2         | 2         | 2         |           | <b>8</b>  | 5            | 5         | 5         | 5         | 5         | <b>25</b> |  |
|                 |                 | <i>Varecia rubra</i>              | 1         | 1         | 1         |           |           | <b>3</b>  |              |           |           |           |           |           |  |
|                 | Loridae         | <i>Loris lydekkerianus</i>        | 5         | 5         | 5         | 5         | 2         | <b>22</b> |              |           |           |           |           |           |  |
|                 | Lorisidae       | <i>Nycticebus pygmaeus</i>        | 5         | 5         | 5         | 2         |           | <b>17</b> |              |           |           |           |           |           |  |

| Order              | Family         | Species                          | Antwerp    |            |            |            |           | Planckendael |            |            |            |            |           |            |
|--------------------|----------------|----------------------------------|------------|------------|------------|------------|-----------|--------------|------------|------------|------------|------------|-----------|------------|
|                    |                |                                  | Session 1  | Session 2  | Session 3  | Session 4  | Session 5 | TOTAL        | Session 1  | Session 2  | Session 3  | Session 4  | Session 5 | TOTAL      |
|                    |                | <b>TOTAL</b>                     | <b>53</b>  | <b>53</b>  | <b>53</b>  | <b>46</b>  | <b>39</b> | <b>244</b>   | <b>36</b>  | <b>36</b>  | <b>36</b>  | <b>33</b>  | <b>40</b> | <b>181</b> |
| <b>Proboscidea</b> | Elephantidae   | <i>Elephas maximus</i>           | 2          | 2          | 2          |            |           | 6            | 5          | 5          | 5          | 5          |           | 20         |
|                    |                | <b>TOTAL</b>                     | <b>2</b>   | <b>2</b>   | <b>2</b>   |            |           | <b>6</b>     | <b>5</b>   | <b>5</b>   | <b>5</b>   | <b>5</b>   |           | <b>20</b>  |
| <b>Rodentia</b>    | Castoridae     | <i>Castor fiber</i>              |            |            |            |            |           |              | 1          | 1          | 1          |            |           | 3          |
|                    | Caviidae       | <i>Dolichotis patagonum</i>      |            |            |            |            |           |              | 5          | 5          | 5          | 5          |           | 20         |
|                    |                | <i>Hydrochoerus hydrochaeris</i> |            |            |            |            |           |              | 3          | 3          | 3          | 2          |           | 11         |
|                    | Dasyproctidae  | <i>Dasyprocta prymnolopha</i>    |            |            |            |            |           |              | 1          | 1          | 1          | 1          |           | 4          |
|                    | Echimidae      | <i>Myocastor coypus</i>          |            |            |            | 5          | 3         | 8            |            |            |            |            |           |            |
|                    | Erethizontidae | <i>Erethizon dorsatum</i>        | 4          | 4          | 4          | 4          |           | 16           |            |            |            |            |           |            |
|                    | Hystriidae     | <i>Hystrix africaeaustralis</i>  |            |            |            | 3          |           | 3            | 3          | 3          | 3          | 5          |           | 14         |
|                    | Murinae        | <i>Lemniscomys barbarus</i>      | 5          | 5          | 5          | 5          |           | 20           |            |            |            |            |           |            |
|                    |                | <i>Phleomys padillus</i>         | 5          | 5          | 5          | 3          | 1         | 19           |            |            |            |            |           |            |
|                    |                | <b>TOTAL</b>                     | <b>14</b>  | <b>14</b>  | <b>14</b>  | <b>20</b>  | <b>4</b>  | <b>66</b>    | <b>13</b>  | <b>13</b>  | <b>13</b>  | <b>13</b>  |           | <b>52</b>  |
| <b>TOTAL</b>       |                |                                  | <b>146</b> | <b>146</b> | <b>146</b> | <b>120</b> | <b>57</b> | <b>615</b>   | <b>220</b> | <b>220</b> | <b>219</b> | <b>200</b> | <b>49</b> | <b>908</b> |
